# Supplementary material
Source: Springer Nature journal article supplement (https://www.springermedizin.de/resource/supplementary/12916_2012_597_MOESM3_ESM.pdf/9597946)

# Number of Novel Clinical Trials

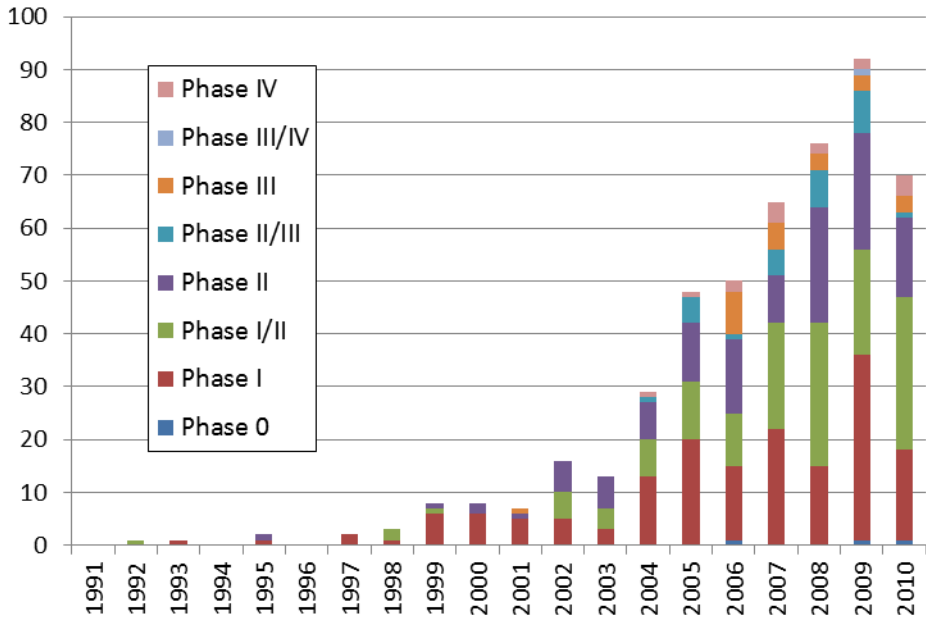

Supplement: MOESM3 [file 9597946]
